# Supplementary material for: Integrated triplex LFIA platform for decentralized molecular subtyping of breast cancer
Source: Royal Society of Chemistry journal article supplement (doi:10.1039/d6ra02096h), 2026-05-12
Supplement: d6ra02096h1.pdf [file d6ra02096h1.pdf]

1

2

3

4 **Supporting Information for**

5

6 **Integrated Triplex LFIA Platform for Decentralized Molecular Subtyping of Breast**  
7 **Cancer**

8 *Wenting Gao<sup>1</sup>, Iftak Hussain<sup>2</sup>, Theopisti A. Nikolaou<sup>1</sup>, Samantha Symons<sup>1</sup>, Ganga Dripaul<sup>1</sup>, Monalisa*  
9 *Almeida<sup>1</sup>, Catherine Guo<sup>2</sup>, Sally Adebamowo<sup>3</sup>, Clement Adebamowo<sup>3\*</sup>, and David Erickson<sup>1,2\*</sup>*

10 <sup>1</sup>*Meinig School of Biomedical Engineering, Cornell University, Ithaca, NY, USA*

11 <sup>2</sup>*Sibley School of Mechanical and Aerospace Engineering, Cornell University, Ithaca, NY, USA*

12 <sup>3</sup>*Greenebaum Comprehensive Cancer Center, and the Department of Epidemiology & Public Health,*  
13 *University of Maryland School of Medicine, Baltimore, MD, USA*

14

15 \*Joint corresponding authors: David Erickson (de54@cornell.edu), and Clement Adebamowo  
16 (cadebamowo@som.umaryland.edu)

17

18

19 **This PDF file includes:**

20 SI Materials and Methods

21 Figures S1 to S7

22 Tables S1 to S5

23

24

25

## 26 **Supporting Information (SI) Materials and Methods**

### 27 **Fluorometric LFIA Dipsticks Assembly and Preparation**

28 LFIA dipsticks were fabricated using Whatman FF170HP membrane cards (Cytiva) with pre-  
29 adhered adhesive backing and CF5 absorbent pads (Cytiva). The nitrocellulose membrane  
30 integrated within the membrane cards had an average capillary flow rate of 45 s/cm, selected to  
31 enhance analyte-reagent interaction and improve detection sensitivity. Biorecognition elements  
32 (e.g. capture antibodies) were immobilized onto the nitrocellulose membrane using a Kinematic  
33 Automated Matrix 1600 dispenser at a precisely controlled dispensing rate of 1  $\mu\text{L}/\text{sec}$ .  
34 Membranes were dried at 37°C for 2 hours under controlled humidity conditions before  
35 integration into the test strip to ensure long-term stability. Absorbent pads were assembled onto  
36 the polystyrene adhesive backing, maintaining a 2 mm overlap with the nitrocellulose membrane  
37 to facilitate efficient solution transfer.

38 Assembled LFIA dipsticks were dipped into 96-well plates containing 64  $\mu\text{L}$  of sample  
39 mix/standard solutions and incubated for 20 min. Fluorescence signals were captured using a  
40 Nikon Eclipse TE2000-E inverted fluorescence microscope with the following scan parameters:  
41 excitation, 365 nm; emission, 610 nm; objective, 20 $\times$  (NA 0.75); exposure time, 1000 ms; gain,  
42 2 $\times$ ; binning, 1 $\times$ 1; filter cube, Ex 360–380 nm / DM 400 nm / Em 600–630 nm; image format,  
43 16-bit TIFF. Images were converted to 8-bit greyscale using Fiji (ImageJ), and mean grey values  
44 of the test dot/line were calculated by averaging greyscale intensities.

### 45 **Optimization of LFIA Parameters**

46 Europium–streptavidin (Eu-SA) nanoparticles (Abcam, ab270228, 0.5% solids suspension) were  
47 used as the fluorescent reporters for all LFIA optimization experiments. Detection antibodies,  
48 capture antibodies, and recombinant protein standards for PR, ER, and HER2 were obtained  
49 from the R&D Systems DuoSet ELISA kits (PR: DYC5415; ER: DYC5715; HER2/ErbB2:  
50 DYC1129), ensuring consistency across reagents and standards. Control-line antibodies  
51 consisted of donkey anti-goat and donkey anti-sheep IgG (Bio-Techne, BAF109 and BAF016).  
52 The conjugation buffer was prepared in-house using 1 $\times$ PBS supplemented with 5% sucrose, 1%  
53 BSA, and 0.5% Tween 20, and the running buffer was prepared using 1 $\times$  PBS supplemented  
54 with 1 $\times$  TBS, 1% (w/v) BSA, 1% (v/v) Tween-20, and 3% (w/v) sucrose.

55 To determine the optimal Eu-SA concentration, LFIA strips were prepared with Eu-SA  
56 conjugates at varying concentrations (0.001–0.01% solids). The conjugates were diluted in the  
57 conjugation buffer and optimized to maintain colloidal stability and prevent nanoparticle  
58 aggregation. Biotinylated bovine serum albumin (BSA) (Vector Laboratories, B-2007-10) was  
59 immobilized at the capture site, and fluorescence intensities were measured. The optimal Eu-SA  
60 concentration was determined based on the highest signal intensity with minimal background,  
61 with 0.005% solids providing the best performance.

62 Recombinant protein standards were diluted in 1 $\times$  PBS supplemented with 1% BSA to stabilize  
63 protein structure and minimize nonspecific interactions during incubation. To optimize the  
64 concentration of biotinylated detection antibodies, LFIA strips were prepared with 0.005% Eu-

65 SA and tested with biotinylated antibodies at concentrations ranging from 0.005 mg/mL to 0.05  
66 mg/mL for each biomarker. Fluorescence intensity increased with antibody concentration but  
67 plateaued beyond 0.01 mg/mL for HER2 and 0.024 mg/mL for PR and ER, where background  
68 noise also increased. These concentrations were selected as they provided optimal signal-to-noise  
69 ratios.

70 To determine the optimal control line antibody concentration, LFIA strips were prepared with a  
71 1:1 mixture of donkey anti-goat and donkey anti-sheep IgG antibodies at concentrations ranging  
72 from 0.01 mg/mL to 0.25 mg/mL. The optimal concentration was identified as 0.1 mg/mL, as it  
73 provided consistent signal intensity at the control line while preventing excessive background  
74 fluorescence.

75 To optimize capture antibody concentrations, LFIA strips were prepared with varying antibody  
76 concentrations for each biomarker: 0.05 mg/mL, 0.1 mg/mL, and 0.5 mg/mL for PR; 0.05  
77 mg/mL, 0.1 mg/mL, and 0.18 mg/mL for ER; and 0.1 mg/mL, 0.36 mg/mL, and 0.72 mg/mL for  
78 HER2. Test lines were spaced 3 mm apart, and each antibody was deposited at a final  
79 concentration of 0.1 mg/mL in 1× PBS supplemented with 2% sucrose to maintain bioactivity  
80 and prevent desiccation-related conformational changes. LFIA strips were incubated with spiked  
81 biomarker solutions (0–1000 pM), and fluorescence intensities of test lines were quantified using  
82 the PROVIDS reader system and the mean test-to-control (T/C) ratio was calculated. The  
83 optimal capture antibody concentrations were determined based on dose-response curves and  
84 signal stability, with 0.1 mg/mL for PR and ER, and 0.36 mg/mL for HER2 providing the highest  
85 test line intensity while avoiding steric hindrance effects.

## 86 **Singleplex Quantitative LFIA of Human PR, ER, or HER2 Proteins**

87 For full-strip singleplex LFIA targeting human total PR, ER, or HER2 proteins, conjugate pads  
88 were impregnated with Eu-SA conjugated biotinylated detection antibodies at optimized  
89 concentrations (0.024 mg/mL for PR and ER, and 0.01 mg/mL for HER2) in the previously  
90 described conjugation buffer. Incubation pads were prepared by pre-treatment with Candor  
91 Blocking Solution (Candor, 100050), followed by sequential washing with PBST (0.05% Tween-  
92 20 in 1× PBS). Both conjugate and incubation pads were air-dried at 37°C for at least 30min and  
93 stored desiccated until assembly.

94 Singleplex LFIA strips were sequentially assembled by affixing the sample pad, conjugate pad,  
95 incubation pad, and absorbent pad onto pre-adhesive nitrocellulose backing cards. Each  
96 component overlapped by 2 mm to ensure regulated fluid flow and optimal antigen-antibody  
97 interactions (Supplementary Fig. 2b). Assembled strips were then cut into consistent 4 mm  
98 widths. The Nitrocellulose membranes contained immobilized capture antibodies at  
99 concentrations of 0.1 mg/mL for PR and ER and 0.36 mg/mL for HER2. A control line  
100 consisting of a 1:1 mixture of donkey anti-goat and donkey anti-sheep IgG antibodies at 0.1  
101 mg/mL, was deposited 5 mm downstream of each test line.

102 Assay execution involved applying 80 µL of recombinant biomarker standards, diluted across  
103 clinically relevant concentrations (0–1000 pM) in 1% BSA prepared in 1× PBS, directly onto the  
104 sample pads. After 3-minute incubation in the dark, 120 µL of running buffer was added to

105 initiate the run. Singleplex LFIA were then incubated in the dark for an additional 20 minutes,  
106 allowing complete migration and analyte binding.

107 Fluorescence intensities were captured using the PROVIDS system. Dose-response curves were  
108 generated by plotting test-to-control intensity ratios (T/C) against known biomarker  
109 concentrations. Data were analyzed by fitting to a four-parameter logistic (4PL) regression  
110 model for accurate quantification of analytical performance parameters.

### 111 **Triplex Quantitative LFIA of Human PR, ER, and HER2 Proteins**

112 For full-strip triplex LFIA simultaneously targeting human PR, ER, and HER2 proteins,  
113 individual singleplex LFIA strips prepared as previously described were arranged in parallel with  
114 a 3 mm edge-to-edge spacing. Each strip interfaced with a shared 10 mm × 18 mm sample pad  
115 through standardized 2 mm overlaps, selected to ensure reproducible capillary flow while  
116 preventing lateral fluid crossover between adjacent nitrocellulose membranes.

117 Triplex assay execution involved applying 240  $\mu$ L aliquots of recombinant biomarker mixtures,  
118 diluted in 1% BSA prepared in 1× PBS, onto the common sample pad. Following a 3-minute  
119 incubation period in the dark, 360  $\mu$ L running buffer was immediately applied. The triplex LFIA  
120 strips were incubated in the dark for an additional 20 minutes to ensure complete analyte binding  
121 and fluid migration. Fluorescence imaging and quantification of PR, ER, and HER2 were  
122 performed using the PROVIDS system. Dose-response curves for each biomarker were  
123 established by plotting T/C ratios against their respective concentrations. Analytical performance  
124 was quantified by fitting these data to a 4PL regression model.

### 125 **Evaluation of Cross-Reactivity and Specificity in Triplex LFIA**

126 To evaluate the cross-reactivity and specificity of the triplex LFIA targeting PR, ER, and HER2  
127 proteins, recombinant protein solutions were prepared individually at high, clinically relevant  
128 concentrations (1000 pM) for each biomarker, with the other two biomarkers set at 0 pM. This  
129 approach simulated critical edge-case scenarios to rigorously assess potential nonspecific  
130 interactions.

131 Fluorescence signals for PR, ER, and HER2 were simultaneously captured using the PROVIDS  
132 imaging system. Signal intensities at both targeted (spiked biomarker) and non-targeted (absent  
133 biomarker) test lines were quantitatively analyzed, and cross-reactivity ratios were calculated by  
134 comparing the intensity at non-target lines relative to the corresponding targeted test line  
135 intensity. The mean cross-reactivity ratios along with standard deviations were computed.  
136 Statistical consistency between singleplex and triplex formats was assessed using paired  
137 Student's t-tests, with statistical significance defined at  $p > 0.05$ .

138 Additionally, a 4PL regression model was applied to determine the baseline fluorescence signal  
139 (minimum asymptote,  $d$ ) in the absence of target biomarkers, providing further validation of  
140 assay specificity. Confidence intervals (95% CI) were derived from the regression analysis to  
141 confirm the stability and precision of the specificity measurements.

## 142 **Comparative Analysis of Triplex LFIA with ELISA**

143 To establish clinically relevant subtype-specific cutoffs for the triplex LFIA, a total of thirty  
144 recombinant protein samples per biomarker (PR, ER, HER2) were selected to represent a broad  
145 spectrum of physiologically and clinically relevant concentrations reflective of breast cancer  
146 molecular subtypes.

147 Human PR, ER, and HER2 ELISAs were performed in accordance with the protocols detailed in  
148 the respective DuoSet ELISA kit manuals (R&D Systems). Briefly, recombinant protein samples  
149 (100  $\mu$ L per well) were incubated on ELISA plates pre-coated with capture antibodies for 2  
150 hours at room temperature. Plates underwent three wash cycles with PBST (0.05% Tween-20 in  
151 PBS), followed by a subsequent incubation with biotinylated detection antibodies for another 2  
152 hours. Post-washing, streptavidin–HRP (100  $\mu$ L per well) was added for 20 minutes, washed  
153 again, and then incubated with substrate solution. Optical density (OD) measurements were  
154 recorded at 450 nm using a SpectraMax MiniMax 300 Imaging Cytometre (Molecular Devices).

155 In parallel, identical recombinant samples were evaluated using the triplex LFIA, with  
156 fluorescence intensities captured for PR, ER, and HER2 using the PROVIDS system. Linear  
157 regression analyses were performed to evaluate the correlation between LFIA and ELISA  
158 measurements for each biomarker, using coefficients of determination ( $R^2$ ) as quantitative  
159 indicators of agreement. Bland-Altman analyses were employed to assess systematic biases and  
160 calculate 95% limits of agreement between the LFIA and ELISA methods. The precision of the  
161 triplex LFIA was additionally quantified by calculating root mean square error (RMSE) values,  
162 providing an objective assessment of assay accuracy and variability. These comprehensive  
163 statistical analyses enabled the establishment of clinically relevant, subtype-specific cutoff  
164 values, aligning the LFIA detection capabilities with established diagnostic thresholds.

## 165 **Validation of Triplex LFIA with Human Breast Cancer Tissue Lysates**

166 *Human Breast Cancer Tissue Lysates*: Commercially sourced human breast cancer lysates were  
167 obtained from OriGene (CP565605 and CP537436), each supplied with vendor-annotated PR,  
168 ER, and HER2 molecular profiles (Supplementary Table S6-2). Lysates were stored at  $-80$  °C  
169 and thawed on ice immediately prior to use. No additional pretreatment or matrix modification  
170 was performed to preserve the native proteomic composition.

171 *ELISA Quantification*: PR, ER, and HER2 concentrations in each lysate were quantified using  
172 DuoSet ELISA kits following the manufacturer's protocols. Lysates were diluted into the  
173 recommended dynamic range and dispensed to achieve an input of 2  $\mu$ g total protein per well.  
174 Absorbance was measured at 450 nm with 570 nm reference subtraction, and blank-corrected  
175 values were fitted to a 4PL model. Analyte concentrations (pg/mL) were obtained by inverting  
176 the 4PL calibration curves. Measurements that fell below the assay lower limit of quantification  
177 (LLOQ) were reported as PR < 1.88 ng/mL and ER < 1.15 ng/mL and carried forward as LLOQ  
178 upper bounds for downstream comparative analyses.

179 *Triplex LFIA Fabrication for Breast Cancer Tissue Lysates*: Triplex LFIA strips were fabricated  
180 on HF135MC nitrocellulose membranes, selected for their balanced capillary wicking rate and

181 capacity to support complex lysate matrices. Spatially segregated PR, ER, and HER2 test lines  
182 were striped using biomarker-specific capture antibodies at 0.36 mg/mL to ensure sufficient  
183 binding capacity for crude lysate inputs. The donkey-IgG control line formulation remained  
184 unchanged relative to the recombinant-protein optimization workflow. Conjugate pad  
185 impregnation, membrane lamination, drying, and cutting were performed as described for the  
186 recombinant antigen assays.

187 *Microfluidic Equalization Using a Passive Distributor*: Singleplex test strips of each biomarker  
188 were assembled into a unified triplex cassette incorporating a passive microfluidic distributor  
189 upstream of the membrane. The network consists of trifurcating microchannels designed with  
190 matched hydraulic resistances to achieve equal volumetric delivery of the sample mixture to the  
191 PR, ER, and HER2 test strips. Channel geometries and mask-level dimensions are provided in  
192 Supplementary Figure 7. This equalization layer minimized lane-to-lane variability and ensured  
193 uniform sample exposure during lysate-based assays.

194 *Triplex LFIA Quantification*: Because crude lysates contain high protein loads and display  
195 elevated viscosity, all samples were diluted 1:5 using sample diluent buffer provided in DuoSet  
196 ELISA kits prior to LFIA analysis to promote uniform flow and prevent premature membrane  
197 fouling. For assay initiation, 240  $\mu\text{L}$  of the diluted lysate was premixed with 300  $\mu\text{L}$  of LFIA  
198 running buffer, resulting in a 540  $\mu\text{L}$  sample-buffer mixture that was dispensed directly into the  
199 sample port of the triplex cassette. Fluorescence images were acquired using PROVIDS, and T/C  
200 ratios for each biomarker lane were extracted using the image-processing pipeline described in  
201 Supplementary Figure 4. Concentrations were determined by numerically inverting the  
202 biomarker-specific 4PL calibration functions derived from recombinant standards.

203 *Normalization and Construction of Expression Matrices*: To enable direct comparison between  
204 ELISA, which reports mass-based concentrations (ng/mL), and Triplex LFIA, which reports  
205 recombinant-equivalent concentrations (pM), all values were normalized within each biomarker  
206 independently. For biomarker  $B$  and sample  $S$ , normalized expression values were computed  
207 according to:

$$\text{Normalized}_{S,B} = \frac{\text{Concentration}_{S,B}}{\max(\text{Concentration}_{CP537436,B}, \text{Concentration}_{CP565605,B})}$$

208

209 In this formulation, the higher-expressing lysate for each biomarker is assigned a normalized  
210 value of 1.00, and the lower-expressing lysate receives a fractional value (0–1). Prior to  
211 normalization, LFIA concentrations were converted to undiluted-equivalent pM values using the  
212 1:5 dilution factor applied during sample preparation. ELISA values falling below assay LLOQ  
213 were normalized using their respective LLOQ upper bounds to maintain conservative estimates  
214 of inter-sample differences.

## 215 **Design and Fabrication of the PROVIDS Reader**

216 The PROVIDS reader housing was fabricated using a Raise3D Pro3 3D printer with black  
217 Polylactic Acid (PLA) filament. PLA was selected for its optical properties, as it effectively  
218 absorbs stray light, reducing interference during fluorescence measurements. Its mechanical

219 stability also ensures that the device maintains alignment and durability under repeated use in  
220 field environments. To optimize device assembly, key components such as the LFIA cartridge,  
221 UV-LED array mount, and camera enclosure were printed separately. These parts were  
222 assembled using precision alignment tools to achieve consistent placement of optical elements.  
223 The final housing design was iteratively refined to ensure compactness and to maintain precise  
224 alignment between the optical path and the test strip.

225 The optical components of the PROVIDS reader were selected to enhance fluorescence detection  
226 efficiency while ensuring safe and consistent illumination. Six low-power UV-A LEDs (DigiKey  
227 P6070T53040500) coaxially mounted on a custom PCB serve as the excitation source. The  
228 illumination assembly is fully enclosed within the reader housing, preventing exposure of users  
229 or bystanders to stray UV-A light. Fluorescence emission is collected through a 610/10 nm band-  
230 pass filter (Thorlabs), which isolates the narrow europium emission peak (~615 nm) and  
231 minimizes background interference. Images are recorded using a Raspberry Pi high-quality  
232 camera (Sony IMX477 sensor,  $4056 \times 3040$  pixels) fitted with an adjustable lens to  
233 accommodate various LFIA configurations. The black PLA housing further stabilizes the optical  
234 path and suppresses ambient light, improving measurement precision.

### 235 **LFIA Image-Processing Pipeline**

236 The PROVIDS reader employs a Python-based software to automate image acquisition,  
237 processing, and biomarker quantification, ensuring robust and reproducible results across diverse  
238 experimental settings. While the *Main Manuscript* and *Supplementary Figure 4* outlines the  
239 general process, this section provides a comprehensive explanation of the algorithmic details,  
240 justifications for methodological choices, and steps to validate the pipeline's performance.

241 *Image Capture and Region of Interest (ROI) Isolation:* High-resolution images of the LFIA test  
242 strips are captured using a Raspberry Pi high-quality camera module, optimized for fluorescence  
243 detection through integrated controlled lighting. Consistent lighting and test strip location across  
244 all samples minimizes the impact of ambient interference, shadows, and uneven illumination,  
245 which could otherwise compromise data integrity. The LFIA Analyzer initiates automated  
246 cropping to isolate each Region of Interest (ROI), focusing on the fluorescence-active areas of  
247 each test strip. This targeted approach eliminates extraneous background regions, streamlining  
248 downstream analyses while maintaining computational efficiency.

249 *Signal Extraction and Noise Reduction:* Following ROI isolation, the cropped images are  
250 converted to grayscale and intensity profiles are extracted as a mean across the horizontal  
251 distance to capture fluorescence variations across the test strip. To improve signal clarity, the  
252 LFIA Analyzer applies a Gaussian filter ( $\sigma = 5$ ) to the extracted signals. This filter effectively  
253 smooths the intensity profiles without distorting critical features such as line width, peak  
254 sharpness, and fluorescence height. Its design is particularly suited for handling fluorescence  
255 data, where maintaining the integrity of the signal is essential for accurate quantification. By  
256 mitigating high-intensity noise originating from the LFIA membrane or inconsistencies in  
257 sample flow, this step lays a solid foundation for reliable signal quantification.

258 *Background Correction:* The extracted image profiles include raw fluorescence data for both the  
259 test and control lines, as well as the surrounding background regions. Background intensity is  
260 calculated using the area between the detected test and control lines and subtracted from the raw  
261 signal to correct for nonspecific fluorescence. This background-subtracted profile improves  
262 quantification accuracy by removing any remaining noise from the smoothed intensity profiles.

263 *Detection of Test and Control Lines:* Using the refined intensity profiles, a function employed to  
264 identify the most prominent peaks within the test region. Peaks are assigned as test (It) or control  
265 (Ic) lines by comparison of their pixel position relative to the center of the ROI. The magnitude  
266 of these peaks is used to calculate the It/Ic ratio. This ratio-based quantification approach  
267 accounts for variability in strip-to-strip fluorescence intensity and ensures robust performance  
268 across a wide dynamic range.

269 *Quantification of Biomarker Levels and Subtype Classification:* The software quantifies  
270 biomarker concentrations by leveraging the test-to-control intensity ratio (It/Ic), which directly  
271 correlates with analyte concentration. Calculated It/Ic ratios are then related to 4PL dose-  
272 response curve equation parameters (Table S1) for each biomarker to quantify PR, ER, and  
273 HER2 concentration of the multiplexed test strips. These estimated concentrations are compared  
274 to the subtype specific cutoffs summarized in Table S3, to classify samples within the  
275 corresponding breast cancer subtype.

276 *Visualization and Quality Control:* The LFIA Analyzer generates visual outputs that overlay  
277 detected test and control lines on the original images, accompanied by annotations of peak  
278 positions and fluorescence intensity. Additionally, smoothed intensity profiles with background  
279 corrections are plotted to highlight the results of each processing step. These visual aids provide  
280 transparency and enable users to validate the accuracy of the automated pipeline. Quality control  
281 measures embedded within the algorithm flag discrepancies, such as missing lines or irregular  
282 profiles, prompting manual review when necessary.

283

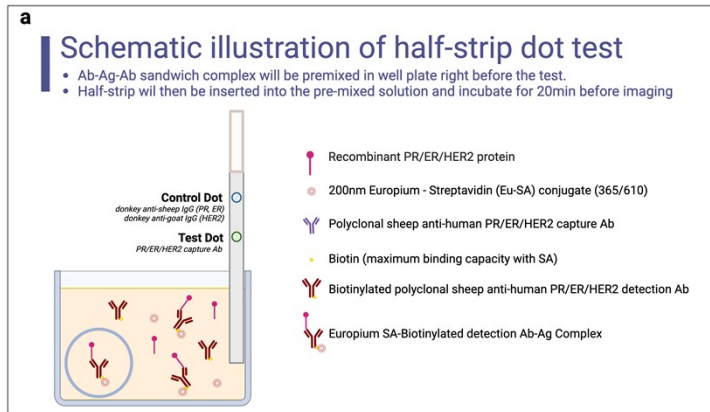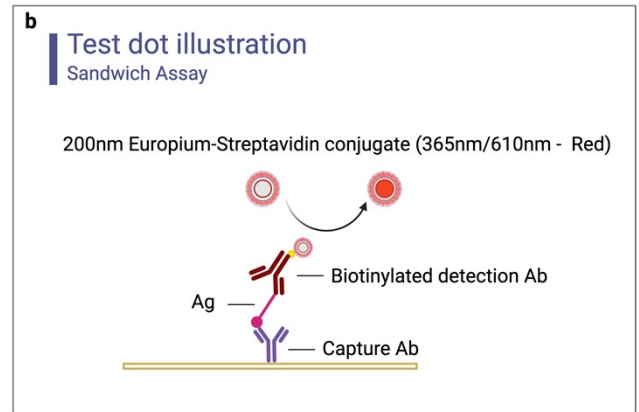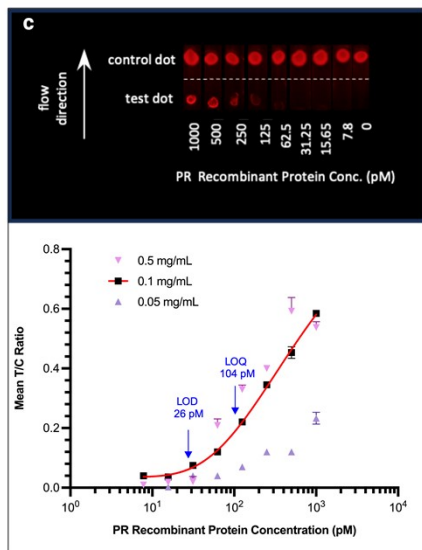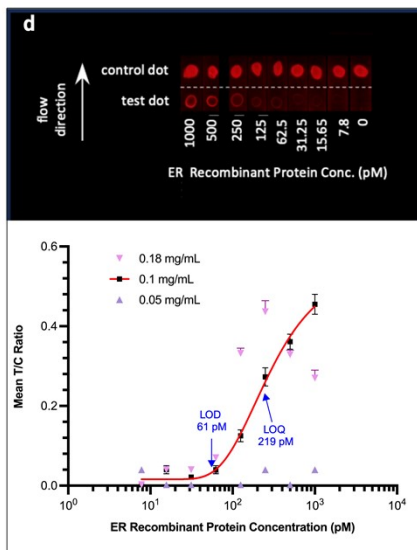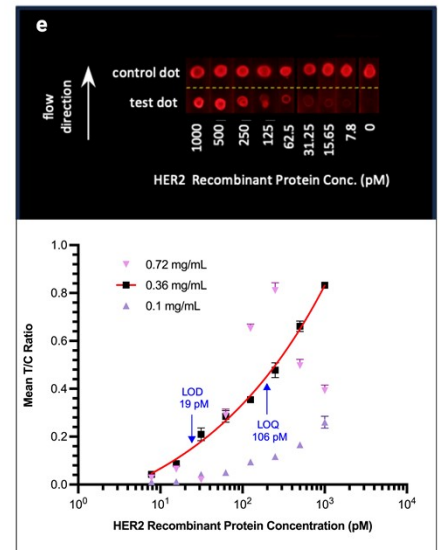

284 **Supplementary Fig. 1: Optimization Secondary IgG Antibody Concentration of Singleplex**  
285 **LFIA**

286 **a**, Schematic illustration of individual LFIA strips comprising human total PR/ER/HER2  
287 capture antibody test dot and a donkey IgG control dot. **b**, Schematic illustration of the sandwich  
288 architecture of reagents at test dot. **c**, PROVIDS built-in code processed images and generated  
289 dose-dependent fluorescence intensities mean T/C ratio curve of human total PR LFIA  
290 constitute of 0.5/0.1/0.05 mg/mL of capture antibody at capture site. Inset: fluorescence images  
291 of human total PR LFIA constitute of 0.1 mg/mL of capture antibody at capture site. **d**,  
292 PROVIDS built-in code processed images and generated dose-dependent fluorescence intensities  
293 mean T/C ratio curve of human total ER LFIA constitute of 0.18/0.1/0.05 mg/mL of capture  
294 antibody at capture site. Inset: fluorescence images of human total ER LFIA constitute of 0.1  
295 mg/mL of capture antibody at capture site. **e**, PROVIDS built-in code processed images and  
296 generated dose-dependent fluorescence intensities mean T/C ratio curve of human total HER2  
297 LFIA constitute of 0.72/0.36/0.1 mg/mL of capture antibody at capture site. Inset: fluorescence  
298 images of human total HER2 LFIA constitute of 0.36 mg/mL of capture antibody at capture site.  
299 Data are mean  $\pm$  s.d.;  $n = 3$  repeated tests. Schematics were created with BioRender.com.

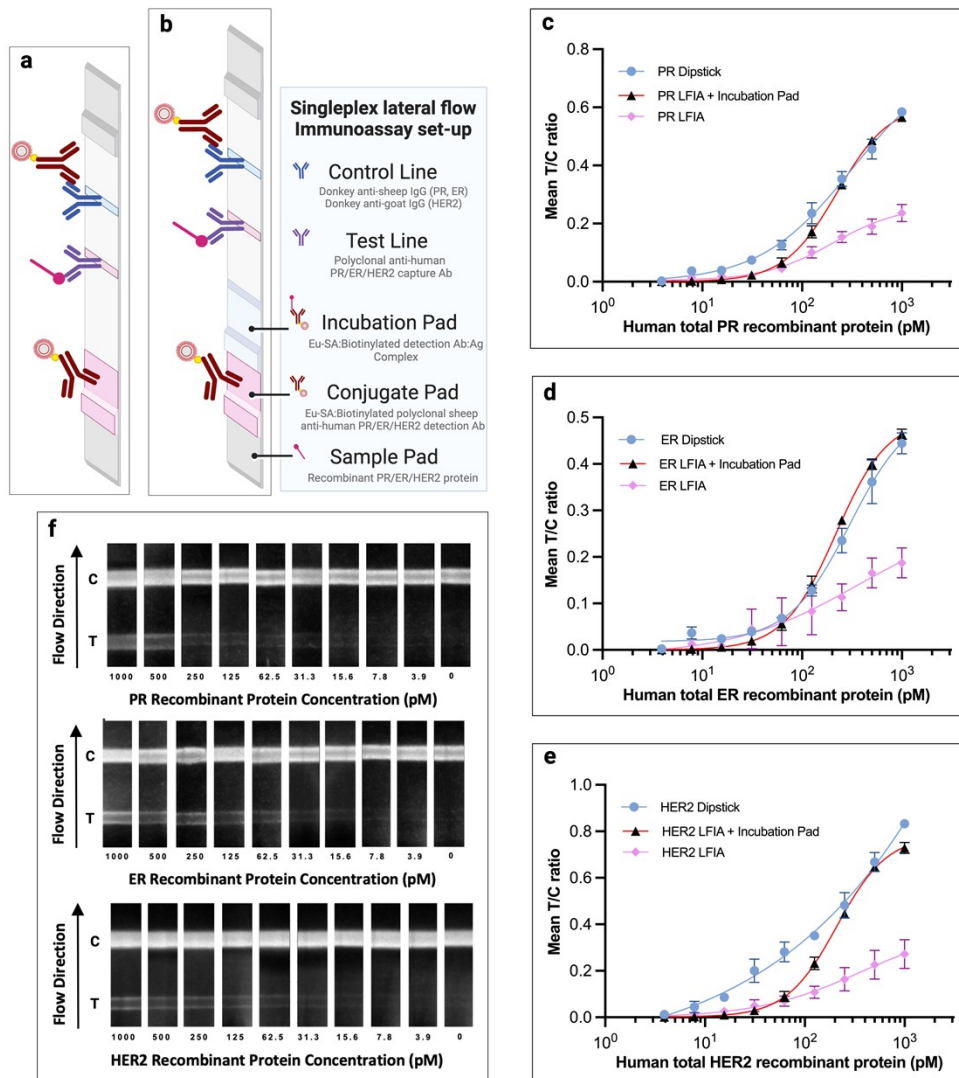

300 **Supplementary Fig. 2: Optimization Singleplex LFIA Architect with Enhanced**  
 301 **Fluorescence Outcomes**

302 **a**, Schematic illustration of a conventional singleplex sandwich LFIA comprising an  
 303 absorption pad, a human total PR/ER/HER2 capture antibody test line, and a donkey IgG control  
 304 line, an [Eu-SA:Biotinylated detection antibody complex] overspread conjugation pad, and a  
 305 sample pad. **b**, Schematic illustration of an optimized singleplex sandwich LFIA comprising  
 306 an absorption pad, a human total PR/ER/HER2 capture antibody test line, and a donkey IgG  
 307 control line, an [Eu-SA:Biotinylated detection antibody complex] overspread conjugation pad, an  
 308 incubation pad for enhanced assay reaction, and a sample pad for analyte and buffer addition. **c**,  
 309 Dose-dependent fluorescence intensities mean T/C ratio curves of singleplex human total PR  
 310 LFIA dipsticks; singleplex LFIAs with conventional architect; and singleplex LFIAs with  
 311 optimized architect in assembly. **d**, Dose-dependent fluorescence intensities mean T/C ratio  
 312 curves of singleplex human total PR LFIA dipsticks; singleplex LFIAs with conventional

313 architect; and singleplex LFIA with optimized architect in assembly. **e**, Dose-dependent  
314 fluorescence intensities mean T/C ratio curves of singleplex human total ER LFIA dipsticks;  
315 singleplex LFIA with conventional architect; and singleplex LFIA with optimized architect in  
316 assembly. **f**, Dose-dependent fluorescence intensities mean T/C ratio curves of singleplex human  
317 total HER2 LFIA dipsticks; singleplex LFIA with conventional architect; and singleplex LFIA  
318 with optimized architect in assembly. **g**, Fluorescence images of optimized human total  
319 PR/ER/HER2 singleplex LFIA. Data are mean  $\pm$  s.d.;  $n = 4$  repeated tests. Schematics were  
320 created with BioRender.com.

321

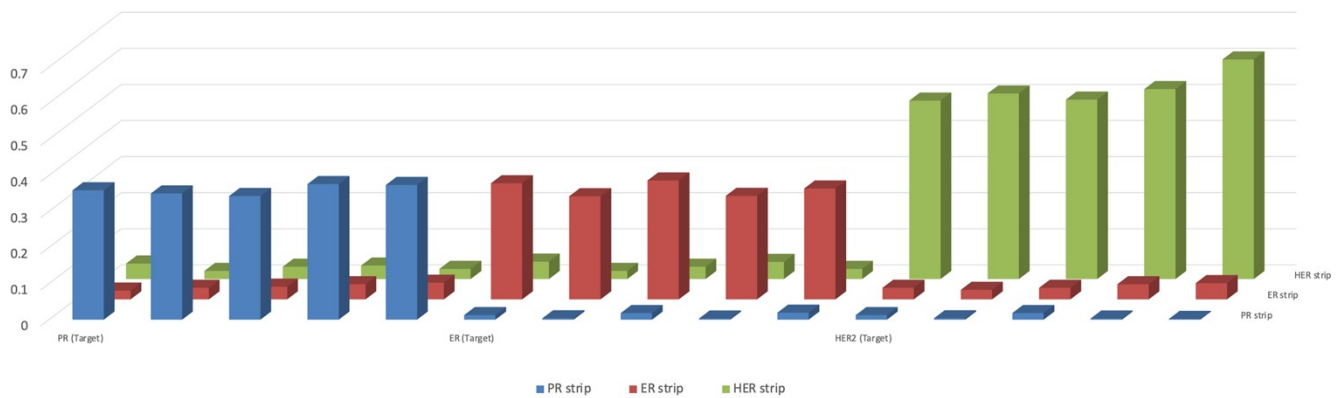

322 **Supplementary Fig. 3: Cross-reactivity analysis of the triplex LFIA with PR, ER, and**  
 323 **HER2 spiking conditions**

324 Bar plot demonstrating the fluorescence mean T/C ratios for PR, ER, and HER2 spiked at 1000  
 325 pM, evaluated across PR, ER, and HER2 test lines to assess cross-reactivity. PR-specific signals  
 326 (blue bars), ER-specific signals (red bars), and HER2-specific signals (green bars) are shown for  
 327 each spiking condition. Each target exhibits robust signals on its corresponding test line, with  
 328 minimal cross-reactivity observed on non-target test lines. Data represent the mean fluorescence  
 329 T/C ratios, highlighting the specificity of the triplex LFIA architecture. Data are mean  $\pm$  s.d.;  $n =$   
 330 5 repeated tests.

331

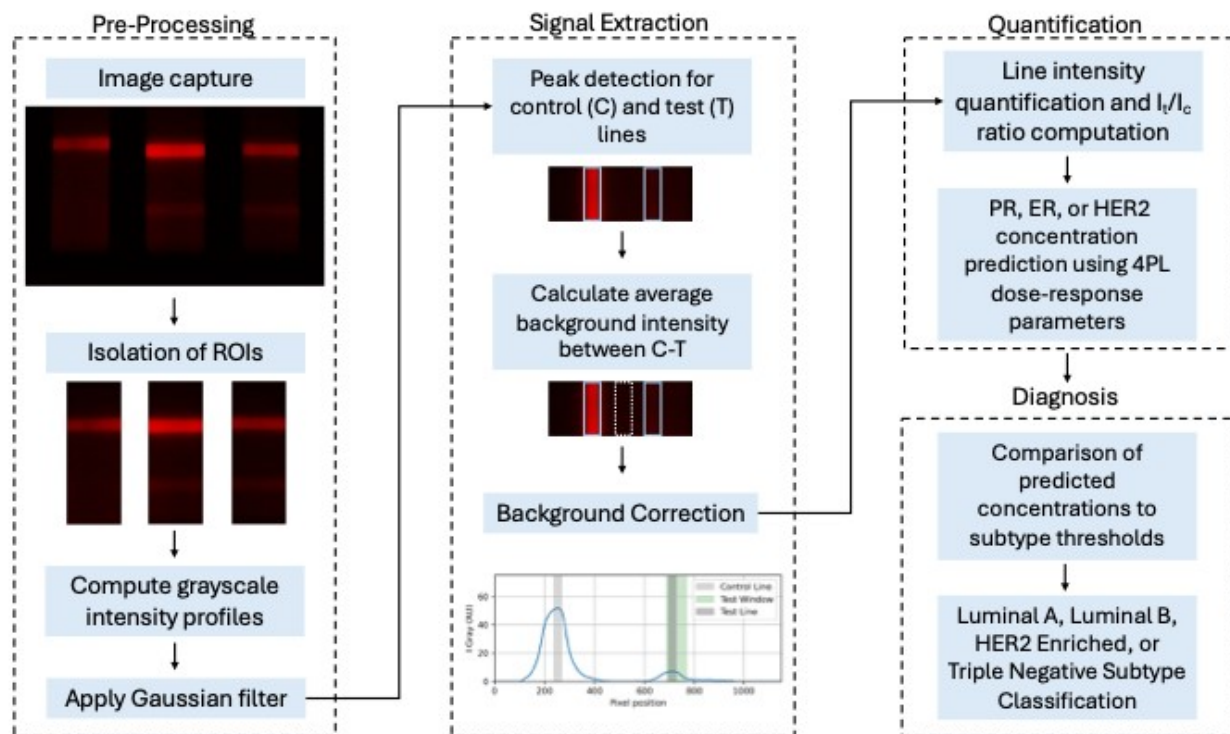

332 **Supplementary Fig. 4: PROVIDS In-Built LFIA Image Processing Pipeline**

333 This figure illustrates the PROVIDS in-built LFIA image processing pipeline, which automates  
 334 biomarker detection and quantification. After capturing high-resolution LFIA images under  
 335 controlled lighting, the pipeline isolates the Region of Interest (ROI) containing the test (T) and  
 336 control (C) lines. Preprocessing includes denoising with a Gaussian filter and peak detection  
 337 algorithms to distinguish line fluorescence from the background. The software detects line  
 338 positions based on fluorescence intensity and geometric features, followed by generating  
 339 horizontal intensity profiles. Background subtraction is performed to correct nonspecific signals,  
 340 and the test-to-control intensity ratio ( $I_t/I_c$ ) is calculated. This ratio is mapped against a  
 341 calibration curve to determine the concentration of the investigated biomarker and compared  
 342 with subtype-specific cutoffs to classify the samples, with results displayed in real time.

343

344

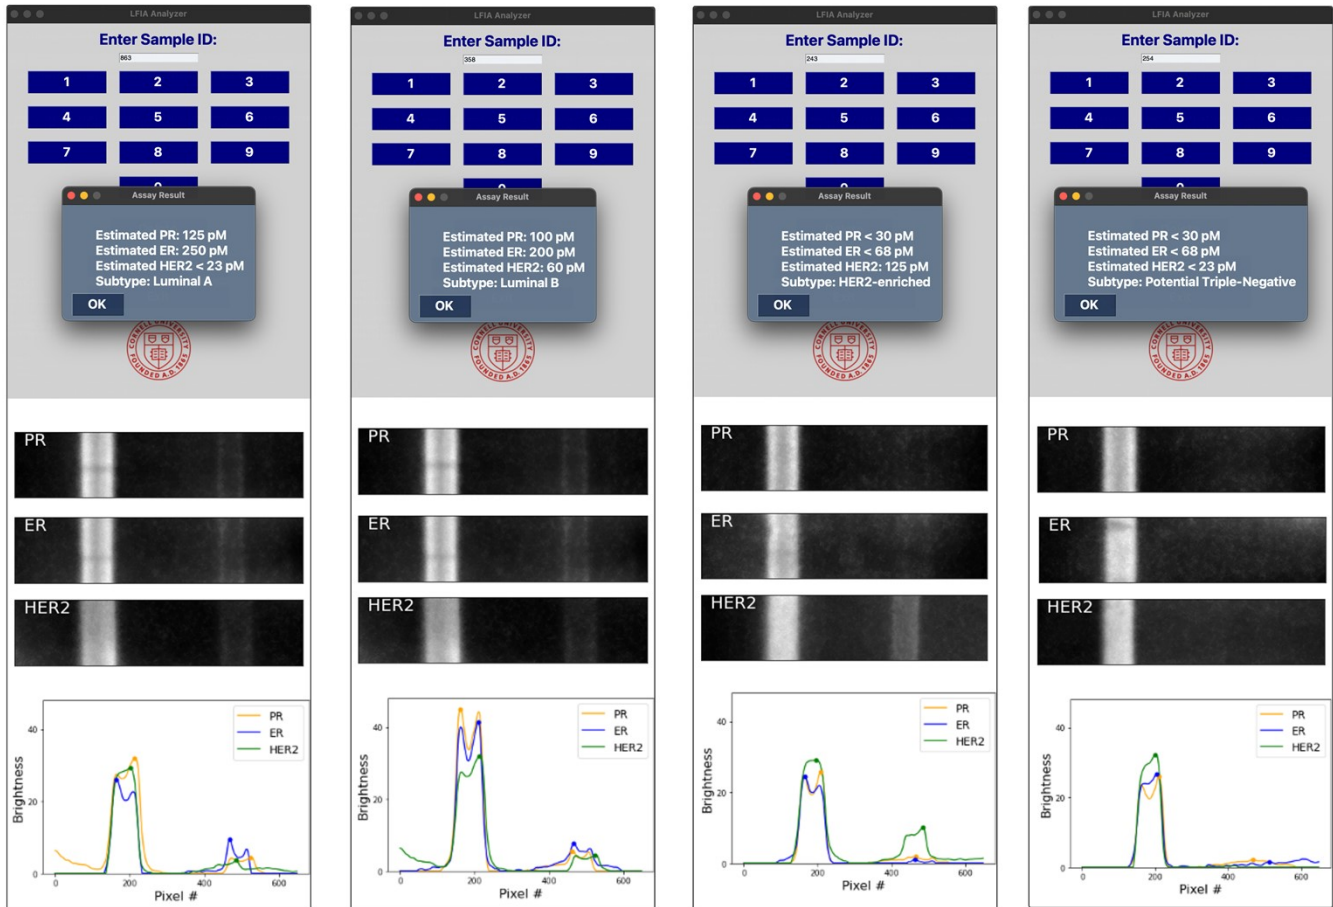

345 **Supplementary Fig. 5: Representative Breast Cancer Subtype Profiles and User Report**  
 346 **Formats**

347 This figure presents grayscale images and intensity profiles for breast cancer subtype-specific  
 348 representative samples. Luminal A (PR high, ER positive, HER2 negative) shows strong PR and  
 349 ER signals, while Luminal B (PR positive, ER positive, HER2 negative) displays moderate  
 350 fluorescence for PR and ER. HER2-enriched subtypes (PR low, ER low, HER2 high) exhibit a  
 351 dominant HER2 signal, and TNBC (PR negative, ER negative, HER2 negative) demonstrates  
 352 minimal fluorescence across all lines. The user interface reports quantitative biomarker  
 353 concentrations or cutoff-based labels, such as “< [cutoff concentration],” and assigns subtype  
 354 classifications based on clinical thresholds. Visual outputs include numerical results for rapid  
 355 interpretation in clinical settings, grayscale images, fluorescence intensity profiles.

356

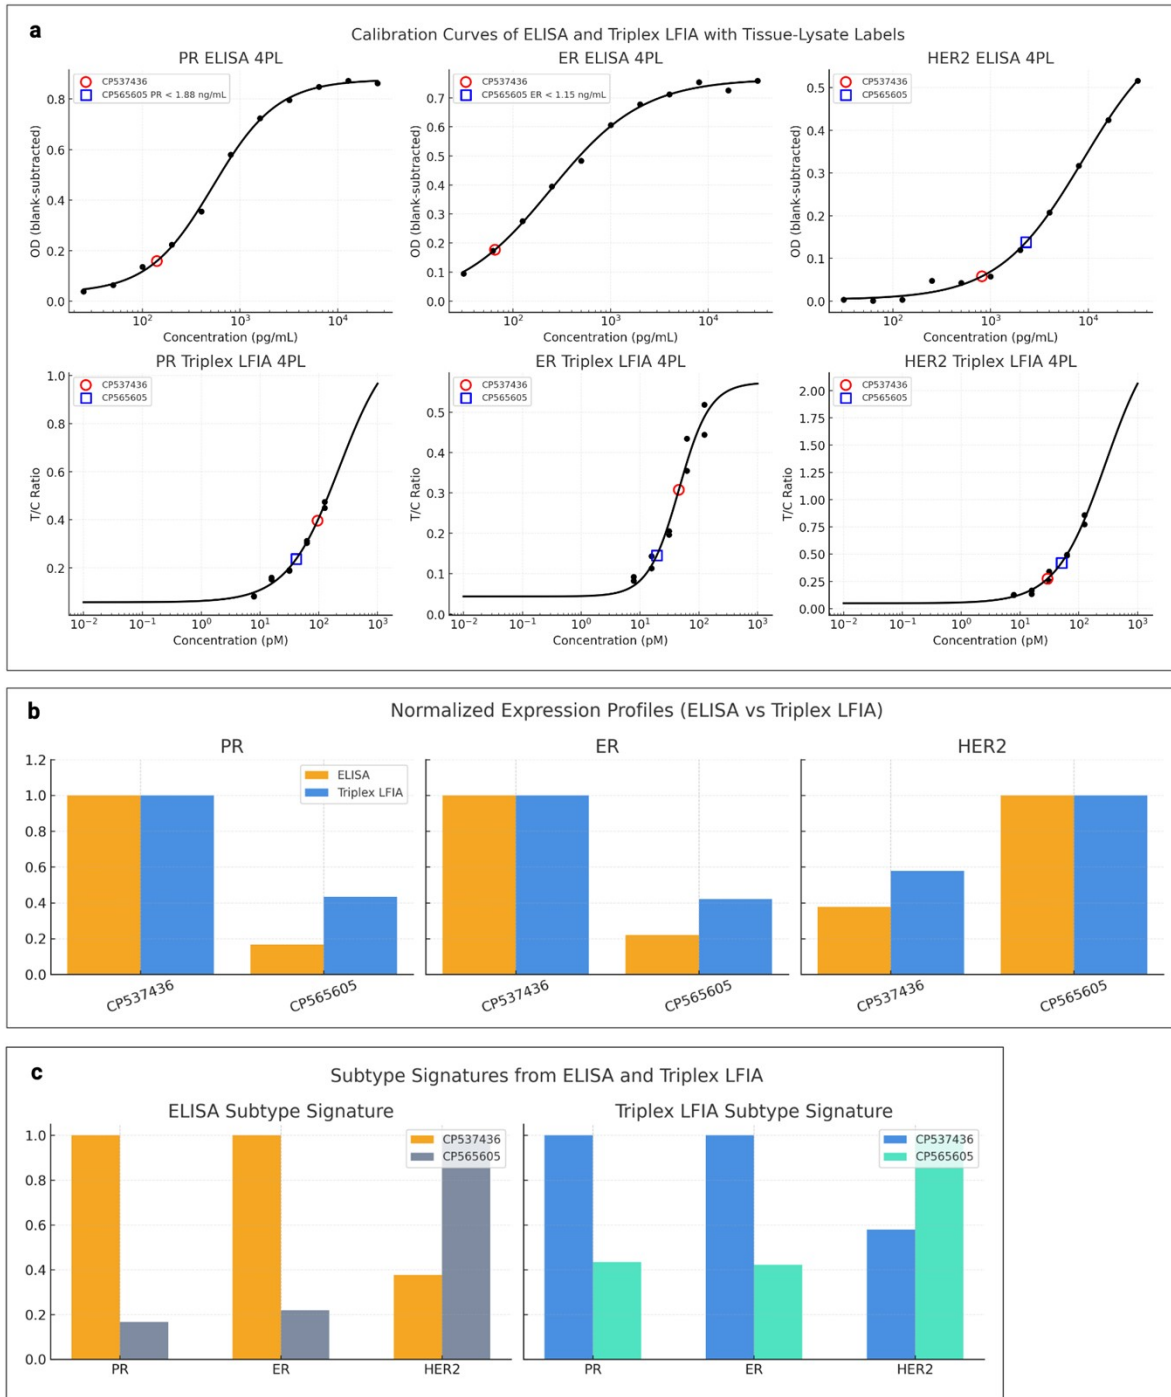

357  
 358 **Supplementary Fig. 6: Quantitative Validation of Triplex LFIA Performance in Human**  
 359 **Breast Cancer Tissue Lysates**

360 **a**, Calibration curves for PR, ER, and HER2 ELISAs and Triplex LFIA with tissue-lysate  
 361 positions. ELISA panels (top row) show four-parameter logistic (4PL) calibration curves  
 362 generated from recombinant standards (n = 2 technical replicates per concentration), plotted as

363 blank-subtracted OD versus working concentration in the assay well (pg/mL). Tissue-lysate  
364 points represent the analyte concentrations present in the ELISA wells after loading 2 µg of total  
365 lysate protein per well (n = 3 technical replicates). For CP537436 (ER<sup>+</sup>/PR<sup>+</sup>), the corresponding  
366 concentrations measured in the ELISA wells were 140.8 pg/mL PR, 65.46 pg/mL ER, and  
367 816.22 pg/mL HER2. For CP565605 (HER2<sup>+</sup>), PR and ER signals at the same protein input were  
368 below the ELISA lower limit of quantification (reported as PR < 1.88 ng/mL and ER < 1.15  
369 ng/mL) and therefore are listed in the legend rather than plotted. HER2 for CP565605 (2306.26  
370 pg/mL) was within the ELISA calibrated range and is shown as a blue open square. Triplex  
371 LFIA panels (bottom row) show 4PL calibration curves plotting T/C Ratio versus recombinant  
372 concentration (pM). Tissue lysate T/C ratios were converted to recombinant-equivalent  
373 concentrations using the LFIA calibration curves and corrected for the 1:5 sample pre-dilution,  
374 yielding diluted-equivalent concentrations of 95.3, 45.8, and 29.4 pM for CP537436 and 41.3,  
375 19.3, and 50.8 pM for CP565605 in the PR, ER, and HER2 channels, respectively. All LFIA  
376 tissue-lysate points fall within the calibrated LFIA dynamic range. **b**, *Normalized PR, ER, and*  
377 *HER2 expression measured by ELISA and Triplex LFIA in breast cancer tissue lysates*. For each  
378 biomarker, ELISA (ng/mL) and Triplex LFIA (recombinant-equivalent pM) concentrations were  
379 independently normalized to the maximum value across the two lysates to enable unit-  
380 independent comparison. CP537436 (ER<sup>+</sup>/PR<sup>+</sup>) exhibits high PR and ER expression and  
381 moderate HER2 expression by both ELISA and LFIA. CP565605 (HER2<sup>+</sup>) shows low PR/ER  
382 expression and high HER2 expression across both platforms. Despite different calibration  
383 chemistries (mass-based ng/mL for ELISA and recombinant-equivalent pM for LFIA), the  
384 normalized expression profiles preserve the same relative biomarker hierarchy for each sample,  
385 demonstrating that Triplex LFIA reproduces the overall expression pattern observed by ELISA  
386 in real tissue lysates. **c**, *Subtype-defining biomarker signatures derived from ELISA and Triplex*  
387 *LFIA*. Subtype signatures were generated by plotting normalized PR, ER, and HER2 expression  
388 for each sample across the three biomarkers. Both platforms identify CP537436 (ER<sup>+</sup>/PR<sup>+</sup>) as  
389 PR-high / ER-high / HER2-low and CP565605 (HER2<sup>+</sup>) as PR-low / ER-low / HER2-high.  
390 Preservation of this subtype pattern across ELISA and Triplex LFIA demonstrates that the LFIA  
391 not only quantifies each biomarker but also accurately reproduces clinically meaningful  
392 expression hierarchies, supporting its potential for translational subtype determination using  
393 crude tissue lysates.

394

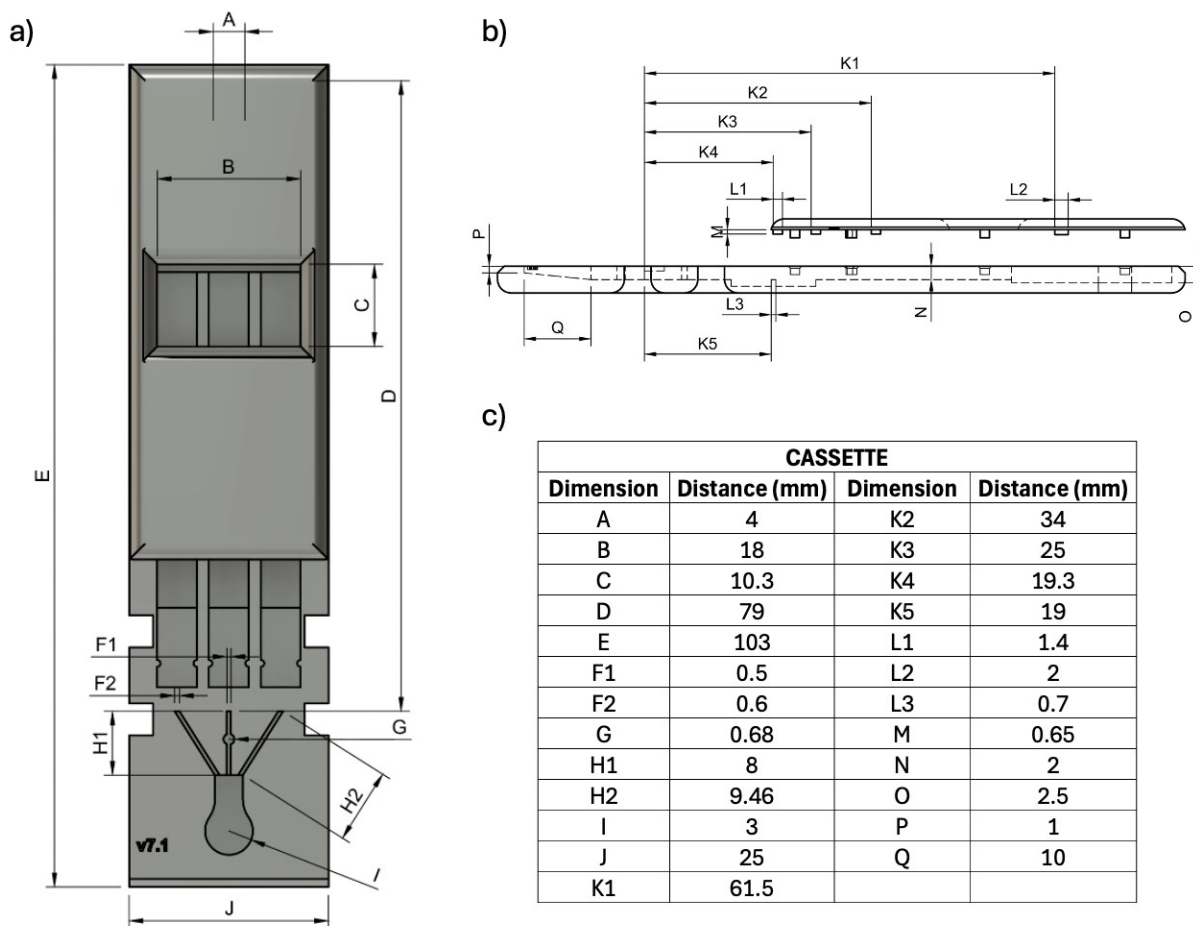

395  
396

397 **Supplementary Fig. 7: Computer-aided design (CAD) of the Triplex LFIA Cassette**  
 398 **Incorporating the Passive Microfluidic Distributor for Sample Division**

399

400 **a**, Top-view rendering showing the overall cassette geometry and the layout of the trifurcating  
 401 microchannels upstream of the nitrocellulose membrane. **b**, Side-view schematic illustrating the  
 402 cassette architecture, channel thickness, and alignment of the membrane and housing  
 403 components. **c**, Table summarizing all annotated dimensions (mm) corresponding to the labeled  
 404 microfluidic and structural design features.

405 **Table S1. Parameters for Sigmoidal Curve Fits of PR, ER, and HER2 in Singleplex and**

| Biomarkers | Parameter | Coefficient (Singleplex) | SE (Singleplex) | 95% CI for LogIC50 (Singleplex) | Coefficient (Triplex) | SE (Triplex) | 95% CI for LogIC50 (Triplex) |
|------------|-----------|--------------------------|-----------------|---------------------------------|-----------------------|--------------|------------------------------|
| PR         | d         | -0.001541                | 0.00087         | -0.02293 to 0.01436             | -0.01926              | 0.00125      | -0.1074 to 0.009142          |
|            | a         | 0.6292                   | 0.0133          | 0.5454 to 0.8087                | 0.5395                | 0.0154       | 0.3929 to 0.6861             |
|            | c         | 2.497                    | 0.0485          | 2.362 to 2.760                  | 2.588                 | 0.0634       | 2.257 to 2.819               |
|            | b         | 0.9428                   | 0.0126          | 0.7321 to 1.157                 | 0.7322                | 0.0187       | 0.2869 to 1.104              |
| ER         | d         | 0.0139                   | 0.0021          | -0.0004386 to 0.02618           | 0.01717               | 0.0031       | 0.004127 to 0.02939          |
|            | a         | 0.4629                   | 0.0342          | 0.4074 to 0.5770                | 0.3043                | 0.0451       | 0.2723 to 0.3600             |
|            | c         | 2.482                    | 0.0453          | 2.384 to 2.663                  | 2.353                 | 0.0532       | 2.268 to 2.481               |
|            | b         | 1.452                    | 0.178           | 1.078 to 1.890                  | 2.212                 | 0.23         | 1.484 to 3.388               |
| HER2       | d         | -0.07721                 | 0.0071          | -0.3145 to 0.007079             | -0.06876              | 0.0059       | -0.1864 to 0.01635           |
|            | a         | 1.609                    | 0.0325          | 1.5453 to 1.6727                | 3.913                 | 0.0468       | 3.8213 to 4.0047             |
|            | c         | 3.206                    | 0.0871          | 3.0353 to 3.3767                | 4.945                 | 0.0946       | 4.7596 to 5.1304             |
|            | b         | 0.4819                   | 0.0483          | 0.3872 to 0.5766                | 0.3862                | 0.0562       | 0.2760 to 0.4964             |

406 **Triplex LFIA**

407 This table provides the parameters and corresponding standard errors (SE) obtained from  
 408 sigmoidal curve fits for PR, ER, and HER2 biomarkers in both singleplex and triplex LFIA  
 409 formats. The 4PL regression equation used is  $Y = d + (a - d)/(1 + (X/c)^b)$ , where  $a$  represents  
 410 the baseline response at low analyte concentrations,  $d$  indicates the maximum response at high  
 411 concentrations,  $c$  (LogIC50) is the concentration at which the response is halfway between  $a$  and  
 412  $d$ , and  $b$  reflects the steepness of the curve (Hill slope). The  $R^2$  values, which indicate the  
 413 goodness of fit for the regression model, are 0.9886 for PR, 0.9755 for ER, and 0.9737 for HER2  
 414 in the singleplex format, and 0.9624 for PR, 0.9429 for ER, and 0.9632 for HER2 in the triplex  
 415 format.

416

| Spiked Biomarker (1000 pM) | Test Line | Mean T/C Ratio (%) | Standard Deviation (%) |
|----------------------------|-----------|--------------------|------------------------|
| PR                         | PR        | 35.98              | ± 1.52                 |
|                            | ER        | 3.41               | ± 0.81                 |
|                            | HER2      | 3.55               | ± 0.72                 |
| ER                         | PR        | 1.44               | ± 0.61                 |
|                            | ER        | 31.14              | ± 1.75                 |
|                            | HER2      | 3.31               | ± 0.61                 |
| HER2                       | PR        | 1.21               | ± 0.54                 |
|                            | ER        | 2.76               | ± 0.78                 |
|                            | HER2      | 50.96              | ± 2.13                 |

417 **Table S2. Cross-Reactivity Analysis of PR, ER, and HER2 in Triplex LFIA**

418 This table summarizes the mean T/C ratios (%) ± SD for PR, ER, and HER2 biomarkers spiked  
419 at 1000 pM, measured across target and non-target test lines to evaluate assay specificity. Data  
420 include normalized fluorescence signals averaged across replicates, with standard deviations  
421 representing variability. Each row presents target-specific signals and cross-reactivity levels to  
422 assess the performance of the triplex LFIA in minimizing nonspecific interactions.

423

| Subtype                | PR Cutoff (pM) | ER Cutoff (pM) | HER2 Cutoff (pM) |
|------------------------|----------------|----------------|------------------|
| Luminal A              | PR > 100 pM    | ER > 100 pM    | HER2 < 23 pM     |
| Luminal B              | PR: 50–150 pM  | ER: 68–200 pM  | HER2: 23–60 pM   |
| HER2-enriched          | PR < 30 pM     | ER < 68 pM     | HER2 > 60 pM     |
| Triple-Negative (TNBC) | PR < 30 pM     | ER < 68 pM     | HER2 < 23 pM     |

424 **Table S3. Subtype-Specific Biomarker Cutoffs for Triplex LFIA**

425 This table defines the refined biomarker cutoffs for breast cancer subtype classification using the  
426 triplex LFIA system. Derived from comparative analysis with ELISA, the cutoffs reflect triplex  
427 LFIA's detection capabilities while maintaining clinical relevance. Subtypes are categorized  
428 based on PR, ER, and HER2 expression profiles, ensuring accurate classification for Luminal A,  
429 Luminal B, HER2-enriched, and TNBC.

430

| <b>Component</b>                                                  | <b>Unit Price</b>   | <b>Usage per Triplex Test</b> | <b>Cost per Test</b> |
|-------------------------------------------------------------------|---------------------|-------------------------------|----------------------|
| Europium–streptavidin nanoparticles (Abcam ab270228, 0.5% solids) | \$375/mL            | 0.04 µL stock                 | <b>\$0.02</b>        |
| Detection antibodies (PR, ER, HER2; R&D Systems DuoSet)           | \$475 per kit       | ~0.07–0.12 µg total           | <b>\$0.18</b>        |
| Capture antibodies (PR, ER, HER2; R&D Systems DuoSet)             | Included above      | ~0.10–0.36 µg                 | <b>\$0.06</b>        |
| Control-line donkey IgG (Bio-Techne BAF109 & BAF016)              | \$129/100 µg        | 0.10 µg                       | <b>\$0.13</b>        |
| Nitrocellulose membrane (Cytiva FF170/FF180)                      | \$10 per sheet      | ~1.5 cm <sup>2</sup> /test    | <b>\$0.03</b>        |
| Sample, conjugate, incubation, absorbent pads                     | \$10–\$15 per sheet | per-test fraction             | <b>\$0.03</b>        |
| Running buffer/conjugation buffer/blocking buffer                 | <\$0.01 each        | —                             | <b>\$0.01</b>        |
| <b>Total Cost per Triplex LFIA</b>                                | —                   | —                             | <b>\$0.30–\$0.35</b> |

431 **Table S4. Raw Material Cost Decomposition for the Triplex LFIA**

432 This table defines the Individual cost contributions from europium–streptavidin nanoparticles,  
433 detection and capture antibodies, control-line antibodies, nitrocellulose membranes,  
434 sample/conjugate/incubation/absorbent pads, and buffers were calculated using vendor pricing  
435 and experimentally determined reagent volumes. The resulting per-test cost of \$0.30–\$0.35 is  
436 comparable to or below commercially reported multiplex AuNP-based LFIA formats.

437

438 **Table S5. Vendor-provided molecular characterization of OriGene breast cancer lysates**  
 439 **used for real-sample validation**

| Lysate ID                                    | Vendor Subtype Annotation                  | ER Status (Vendor) | PR Status (Vendor) | HER2 Status (Vendor)             | Reported Vendor Characterization Method            | Biological Matrix             | Intended Use (Vendor)                                                      | Expected Molecular Phenotype                                                  |
|----------------------------------------------|--------------------------------------------|--------------------|--------------------|----------------------------------|----------------------------------------------------|-------------------------------|----------------------------------------------------------------------------|-------------------------------------------------------------------------------|
| CP565605 (HER2 <sup>+</sup> )                | HER2-overexpressing breast carcinoma       | Negative / low     | Negative / low     | Positive (HER2-high)             | Internal immunoassay QC (IHC / antibody profiling) | Human breast carcinoma lysate | Positive control lysate for HER2-high breast cancer                        | <b>HER2-enriched</b> (ER <sup>-</sup> / PR <sup>-</sup> / HER2 <sup>+</sup> ) |
| CP537436 (ER <sup>+</sup> /PR <sup>+</sup> ) | Hormone receptor-positive breast carcinoma | Positive           | Positive           | Negative-intermediate (HER2-low) | Internal immunoassay QC (IHC / antibody profiling) | Human breast carcinoma lysate | Positive control lysate for ER <sup>+</sup> /PR <sup>+</sup> breast cancer | <b>Luminal B-like</b> (ER <sup>+</sup> / PR <sup>+</sup> / HER2-low)          |

440

441 This table summarizes the receptor-status annotations supplied by OriGene for the two human  
 442 breast cancer lysates evaluated in this study. CP565605 is characterized as a HER2-  
 443 overexpressing carcinoma with low/negative ER and PR expression, while CP537436 is  
 444 annotated as a hormone receptor-positive carcinoma exhibiting ER<sup>+</sup>/PR<sup>+</sup> profiles with low HER2  
 445 expression. Vendor characterization was performed through OriGene’s internal immunoassay  
 446 quality control pipeline (e.g., IHC or antibody-profiling methods). These annotations were used  
 447 as independent reference phenotypes for confirming subtype agreement in *Supplementary Figure*  
 448 *6*.

449
